# Supplementary material
Source: publisher figshare collection journal article supplement (https://asha.figshare.com/articles/dataset/_/27228702)
Supplement: Supplementary file 1 [file 1]

**Supplemental Material S4.** Subtest scores across children with 16p11.2 CNVs and siblings.

|                |                          | <b>16p11.2Dup</b> | <b>16p11.2DS</b> | <b>Siblings of<br/>16p11.2DS</b> |
|----------------|--------------------------|-------------------|------------------|----------------------------------|
| Subtest scores | CFD (5.00 – 12.11 years) |                   |                  |                                  |
|                | <i>n</i>                 | 8*                | 14               | 5                                |
|                | <i>M (SD)</i>            | 3.75 (3.15)       | 4.64 (3.08)      | 8.40 (2.30)                      |
|                | Median                   | 1.00              | 4.50             | 10.00                            |
|                | Range                    | 1.00–8.00         | 1.00–11.00       | 5.00–10.00                       |
|                | SST/SR                   |                   |                  |                                  |
|                | <i>n</i>                 | 10                | 23               | 8                                |
|                | <i>M (SD)</i>            | 3.50 (2.88)       | 4.83 (3.21)      | 8.88 (3.40)                      |
|                | Median                   | 2.50              | 4.00             | 9.50                             |
|                | Range                    | 1.00–10.00        | 1.00–12.00       | 4.00–15.00                       |
|                | SST                      |                   |                  |                                  |
|                | <i>n</i>                 | 4                 | 7                | 2                                |
|                | <i>M (SD)</i>            | 5.50 (3.42)       | 3.43 (3.10)      | 7.00 (4.24)                      |
|                | Median                   | 5.00              | 2.00             | 7.00                             |
|                | Range                    | 2.00–10.00        | 1.00–9.00        | 4.00–10.00                       |
|                | SR                       |                   |                  |                                  |
|                | <i>n</i>                 | 6                 | 16               | 6                                |
|                | <i>M (SD)</i>            | 2.17 (1.60)       | 5.44 (3.16)      | 9.50 (3.27)                      |
|                | Median                   | 1.50              | 5.00             | 9.50                             |
|                | Range                    | 1.00–5.00         | 1.00–12.00       | 5.00–15.00                       |
|                | WC-R                     |                   |                  |                                  |
|                | <i>n</i>                 | 10                | 23               | 8                                |
|                | <i>M (SD)</i>            | 4.60 (3.92)       | 5.39 (3.06)      | 9.75 (2.96)                      |
|                | Median                   | 3.00              | 6.00             | 11.00                            |
|                | Range                    | 1.00–12.00        | 1.00–12.00       | 5.00–13.00                       |
| Subtest scores | RS                       |                   |                  |                                  |
|                | <i>n</i>                 | 10                | 23               | 8                                |
|                | <i>M (SD)</i>            | 3.50 (2.27)       | 3.30 (2.72)      | 9.13 (3.09)                      |
|                | Median                   | 3.50              | 2.50             | 8.00                             |
|                | Range                    | 1.00–6.00         | 1.00–8.00        | 6.00–15.00                       |
|                | FS                       |                   |                  |                                  |
|                | <i>n</i>                 | 10                | 21               | 8                                |
|                | <i>M (SD)</i>            | 3.50 (3.14)       | 3.43 (3.56)      | 8.13 (2.36)                      |
|                | Median                   | 2.00              | 2.00             | 8.50                             |
|                | Range                    | 1.00–9.00         | 1.00–15.00       | 4.00–11.00                       |
|                | WC-E                     |                   |                  |                                  |
|                | <i>n</i>                 | 10                | 23               | 8                                |
|                | <i>M (SD)</i>            | 4.20 (3.83)       | 4.13 (2.74)      | 8.63 (1.60)                      |
|                | Median                   | 2.50              | 4.00             | 9.00                             |
|                | Range                    | 1.00–10.00        | 1.00–9.00        | 6.00–11.00                       |
|                | WS (5.00 – 8.11 years)   |                   |                  |                                  |
|                | <i>n</i>                 | 4                 | 8                | 2                                |
|                | <i>M (SD)</i>            | 5.50 (2.65)       | 4.00 (2.51)      | 8.00 (2.83)                      |
|                | Median                   | 5.00              | 4.00             | 8.00                             |

|                          | Range         | 3.00–9.00   | 1.00–8.00   | 6.00–10.00  |
|--------------------------|---------------|-------------|-------------|-------------|
| EV (5.00 – 9.11 years)   |               |             |             |             |
| <i>n</i>                 | 6             | 10          | 4           |             |
| <i>M (SD)</i>            | 5.33 (3.50)   | 5.50 (3.44) | 8.25 (2.36) |             |
| Median                   | 5.00          | 4.50        | 9.00        |             |
| Range                    | 1.00–10.00    | 1.00–11.00  | 5.00–10.00  |             |
| WD ( $\geq 10.00$ years) |               |             |             |             |
| <i>n</i>                 | 4             | 13          | 4           |             |
| <i>M (SD)</i>            | 1.00 (0.00)   | 3.31 (2.21) | 8.75 (4.03) |             |
| Median                   | 1.00          | 4.00        | 9.00        |             |
| Range                    | 1.00–1.00     | 1.00–7.00   | 4.00–13.00  |             |
| Subtest scores WC-T      |               |             |             |             |
| combined                 | <i>n</i>      | 10          | 23          | 8           |
| receptive and            | <i>M (SD)</i> | 4.40 (4.01) | 4.57 (2.87) | 8.13 (2.03) |
| expressive               | Median        | 2.50        | 5.00        | 9.50        |
|                          | Range         | 1.00–11.00  | 1.00–10.00  | 6.00–12.00  |

*Note.* CFD = Concepts and Following Directions; RS = Recalling Sentences; FS = Formulated Sentences; WS = Word Structure; SST = Sentence Structure (5.00 – 8.11 years); SR = Semantic Relations ( $\geq 9.00$  years); WC-R = Word Classes-Receptive; WC-E = Word Classes-Expressive; WC-T = Word Classes-Total; EV = Expressive Vocabulary; WD = Word Definitions (cut-off:  $< 7$ : mild-moderate problems;  $< 4$ : severe problems).

\* Available data vary by subtest due to different age ranges of specific subtests or missing data.
