# Supplementary material
Source: publisher figshare collection journal article supplement (https://asha.figshare.com/articles/dataset/_/27228702)
Supplement: Supplementary file 2 [file 1]

**Supplemental Material S7.** Descriptive statistics CELF CLS across subgroups based on potential confounding factors in 16p11.2 CNVs.

|                            |               | 16p11.2DS     | 16p11.2Dup    |
|----------------------------|---------------|---------------|---------------|
| <b>Inheritance pattern</b> | De novo       |               |               |
|                            | <i>n</i>      | 12            | 2             |
|                            | <i>M (SD)</i> | 67.25 (17.43) | 68.50 (19.09) |
|                            | Median        | 60.50         | 68.50         |
|                            | Range         | 55.00–113.00  | 55.00–82.00   |
|                            | Inherited     |               |               |
|                            | <i>n</i>      | 3             | 2             |
|                            | <i>M (SD)</i> | 58.67 (4.04)  | 72.00 (22.63) |
|                            | Median        | 58.00         | 72.00         |
|                            | Range         | 55.00–63.00   | 56.00–88.00   |
| <b>ASD diagnosis</b>       | ASD           |               |               |
|                            | <i>n</i>      | 10            | 7             |
|                            | <i>M (SD)</i> | 63.40 (8.90)  | 63.71 (14.65) |
|                            | Median        | 60.50         | 55.00         |
|                            | Range         | 55.00–84.00   | 55.00–88.00   |
|                            | No ASD        |               |               |
|                            | <i>n</i>      | 12            | 3             |
|                            | <i>M (SD)</i> | 65.58 (16.81) | 66.67 (12.01) |
|                            | Median        | 58.50         | 66.00         |
|                            | Range         | 55.00–113.00  | 55.00–79.00   |
| <b>ADHD diagnosis</b>      | ADHD          |               |               |
|                            | <i>n</i>      | 7             | 6             |
|                            | <i>M (SD)</i> | 62.00 (8.62)  | 62.50 (13.22) |
|                            | Median        | 58.00         | 55.50         |
|                            | Range         | 55.00–76.00   | 55.00–88.00   |
|                            | No ADHD       |               |               |
|                            | <i>n</i>      | 15            | 4             |
|                            | <i>M (SD)</i> | 65.80 (14.42) | 67.75 (14.77) |
|                            | Median        | 61.00         | 67.00         |
|                            | Range         | 55.00–113.00  | 55.00–82.00   |
| <b>Sex</b>                 | Female        |               |               |
|                            | <i>n</i>      | 14            | 5             |
|                            | <i>M (SD)</i> | 66.57 (16.33) | 62.80 (11.69) |
|                            | Median        | 60.00         | 56.00         |
|                            | Range         | 55.00–113.00  | 55.00–82.00   |
|                            | Male          |               |               |
|                            | <i>n</i>      | 9             | 5             |
|                            | <i>M (SD)</i> | 62.67 (7.07)  | 66.40 (15.93) |
|                            | Median        | 62.00         | 55.00         |
|                            | Range         | 55.00–72.00   | 55.00–88.00   |
| <b>SES</b>                 | High          |               |               |
|                            | <i>n</i>      | 9             | 2             |
|                            | <i>M (SD)</i> | 65.89 (10.61) | 68.50 (19.09) |
|                            | Median        | 61.00         | 68.50         |
|                            | Range         | 55.00–84.00   | 55.00–82.00   |

|               |               |               |
|---------------|---------------|---------------|
| Middle        |               |               |
| <i>n</i>      | 12            | 5             |
| <i>M (SD)</i> | 65.17 (16.48) | 66.40 (15.93) |
| Median        | 59.00         | 55.00         |
| Range         | 55.00–113.00  | 55.00–88.00   |
| Low           |               |               |
| <i>n</i>      | 2             | 3             |
| <i>M (SD)</i> | 60.50 (3.54)  | 59.00 (6.08)  |
| Median        | 60.50         | 56.00         |
| Range         | 58.00–63.00   | 55.00–66.00   |

*Note.* ASD = autism spectrum disorder; ADHD = attention-deficit/hyperactivity disorder, SES = socioeconomic status.
