# Supplementary material
Source: publisher figshare collection journal article supplement (https://asha.figshare.com/articles/dataset/_/27228702)
Supplement: Supplementary file 3 [file 1]

**Supplemental Material S5.** Cross-CNV and intrafamilial proportion differences across composite scores.

|          | <b>16p11.2DS<br/>(<i>n</i> = 23)<br/>% with<br/>problems<br/>(<i>&lt; -1 SD</i>)</b> | <b>16p11.2Dup<br/>(<i>n</i> = 10)<br/>% with<br/>problems<br/>(<i>&lt; -1 SD</i>)</b> | <b>Statistical outcomes<br/>subgroup level<br/>Fisher's exact<br/>(<i>p</i> = , <i>OR</i> = )</b> |
|----------|--------------------------------------------------------------------------------------|---------------------------------------------------------------------------------------|---------------------------------------------------------------------------------------------------|
| CELF CLS | 22/23 (96%)                                                                          | 9/10 (90%)                                                                            | <i>p</i> = .521; <i>OR</i> = -0.863                                                               |
| CELF RLI | 18/23 (78%)                                                                          | 9/10 (90%)                                                                            | <i>p</i> = .640; <i>OR</i> = 0.892                                                                |
| CELF ELI | 21/23 (91%)                                                                          | 8/10 (80%)                                                                            | <i>p</i> = .567; <i>OR</i> = -0.932                                                               |
| PPVT WCS | 13/21 (62%)                                                                          | 6/10 (60%)                                                                            | <i>p</i> = 1.000; <i>OR</i> = -0.077                                                              |
| FSIQ     | 18/21 (86%)                                                                          | 7/10 (70%)                                                                            | <i>p</i> = .358; <i>OR</i> = -0.911                                                               |
| NVI      | 21/22 (95%)                                                                          | 9/10 (90%)                                                                            | <i>p</i> = .534; <i>OR</i> = -0.818                                                               |
| SRS-2    | 17/21 (81%)                                                                          | 9/10 (90%)                                                                            | <i>p</i> = 1.000; <i>OR</i> = 0.729                                                               |

  

|          | <b>16p11.2DS<br/>(<i>n</i> = 8)<br/>% with<br/>problems<br/>(<i>&lt; -1 SD</i>)</b> | <b>Siblings of<br/>16p11.2DS<br/>(<i>n</i> = 8)<br/>% with<br/>problems<br/>(<i>&lt; -1 SD</i>)</b> | <b>Statistical outcomes<br/>subgroup level<br/>Fisher's exact<br/>(<i>p</i> = , <i>OR</i> = )</b> |
|----------|-------------------------------------------------------------------------------------|-----------------------------------------------------------------------------------------------------|---------------------------------------------------------------------------------------------------|
| CELF CLS | 8/8 (100%)                                                                          | 2/8 (25%)                                                                                           | <i>p</i> = .007**; <i>OR</i> = -∞                                                                 |
| CELF RLI | 6/8 (75%)                                                                           | 3/8 (38%)                                                                                           | <i>p</i> = .315; <i>OR</i> = -1.498                                                               |
| CELF ELI | 8/8 (100%)                                                                          | 2/8 (25%)                                                                                           | <i>p</i> = .007**; <i>OR</i> = -∞                                                                 |
| PPVT WCS | 5/8 (62%)                                                                           | 3/8 (38%)                                                                                           | <i>p</i> = .619; <i>OR</i> = -0.955                                                               |
| FSIQ     | 7/7 (100%)                                                                          | 3/8 (38%)                                                                                           | <i>p</i> = .026*; <i>OR</i> = -∞                                                                  |
| NVI      | 8/8 (100%)                                                                          | 2/8 (25%)                                                                                           | <i>p</i> = .007**; <i>OR</i> = -∞                                                                 |
| SRS-2    | 8/8 (100%)                                                                          | 0/8 (0%)                                                                                            | <i>p</i> < .001**; <i>OR</i> = -∞                                                                 |

*Note.* CLS = Core Language Score; RLI = Receptive Language Index; ELI = Expressive Language Index; WCS = Word Comprehension Score; FSIQ = Full-Scale IQ; NVI = Nonverbal Index (norm group average = 100, cut-off: < 85: mild-moderate, < 70: severe); SRS-2 = Social Responsiveness Scale (norm group average = 50, cut-off: > 60: mild-moderate, > 75: severe). Statistical outcomes: *p*-value; \*significant at *p* < .05, \*\*significant with FDR. Odds ratio (*OR*) as effect size.
