# Supplementary material
Source: publisher figshare collection journal article supplement (https://asha.figshare.com/articles/dataset/_/27228702)
Supplement: Supplementary file 4 [file 1]

**Supplemental Material S2.** Intraindividual comparisons for each group across receptive vs. expressive, receptive vocabulary vs. receptive language, and core language vs. Nonverbal Index scores.

|                                      | <b>16p11.2DS<br/>(<i>n</i> = 23)</b> | <b>Statistical<br/>outcomes<br/>paired <i>t</i>-test</b> | <b>16p11.2Dup<br/>(<i>n</i> = 10)</b> | <b>Statistical<br/>outcomes<br/>paired <i>t</i>-test</b> | <b>Siblings of<br/>16p11.2DS<br/>(<i>n</i> = 8)</b> | <b>Statistical<br/>outcomes<br/>paired <i>t</i>-test</b> |
|--------------------------------------|--------------------------------------|----------------------------------------------------------|---------------------------------------|----------------------------------------------------------|-----------------------------------------------------|----------------------------------------------------------|
| <b>CELF RLI <i>M</i> (<i>SD</i>)</b> | 71.91 (14.09)                        | <i>t</i> = 3.925                                         | 67.00 (15.25)                         | <i>t</i> = 1.326                                         | 92.88 (12.24)                                       | <i>t</i> = 0.766                                         |
| Median ↓                             | 66.00                                | <b><i>p</i> &lt; .001**</b>                              | 60.00                                 | <i>p</i> = .218                                          | 95.00                                               | <i>p</i> = .469                                          |
| <b>CELF ELI <i>M</i> (<i>SD</i>)</b> | 63.61 (13.40)                        | <i>d</i> = 0.818                                         | 65.10 (14.48)                         | <i>d</i> = .419                                          | 90.75 (13.83)                                       | <i>d</i> = 0.271                                         |
| Median                               | 58.00                                |                                                          | 55.50                                 |                                                          | 91.00                                               |                                                          |
| <b>CELF RLI <i>M</i> (<i>SD</i>)</b> | 71.91 (14.09)                        | <i>t</i> = -3.765                                        | 67.00 (15.25)                         | <i>W</i> = 2.000                                         | 92.88 (12.24)                                       | <i>t</i> = -0.325                                        |
| Median ↓                             | 66.00                                | <b><i>p</i> = .001**</b>                                 | 60.00                                 | <b><i>p</i> = .018**</b>                                 | 95.00                                               | <i>p</i> = .755                                          |
| <b>PPVT WCS <i>M</i> (<i>SD</i>)</b> | 80.29 (13.86)                        | <i>d</i> = -0.822                                        | 77.40 (21.81)                         | <i>r</i> = -0.911                                        | 94.38 (18.47)                                       | <i>d</i> = -0.115                                        |
| Median                               | 81.00                                |                                                          | 71.50                                 |                                                          | 95.00                                               |                                                          |
| <b>CELF CLS <i>M</i> (<i>SD</i>)</b> | 65.04 (13.40)                        | <i>t</i> = -2.302                                        | 64.00 (13.31)                         | <i>t</i> = -2.973                                        | 92.63 (13.47)                                       | <i>t</i> = 0.104                                         |
| Median ↓                             | 61.00                                | <b><i>p</i> = .032*</b>                                  | 55.50                                 | <b><i>p</i> = .016**</b>                                 | 92.50                                               | <i>p</i> = .920                                          |
| <b>NVI <i>M</i> (<i>SD</i>)</b>      | 73.00 (14.35)                        | <i>d</i> = -0.491                                        | 69.70 (16.43)                         | <i>d</i> = -0.940                                        | 92.25 (15.50)                                       | <i>d</i> = 0.037                                         |
| Median                               | 75.00                                |                                                          | 65.00                                 |                                                          | 90.00                                               |                                                          |

*Note.* Statistical outcomes: *p*-value; \*significant at *p* < .05, \*\*significant with FDR.
