# Supplementary material
Source: publisher figshare collection journal article supplement (https://asha.figshare.com/articles/dataset/_/27228702)

**Supplemental Material S3.** CELF subtest scores per group. CFD = Concepts and Following Directions; RS = Recalling Sentences; FS = Formulated Sentences; WS = Word Structure; SST = Sentence Structure (5.00 – 8.11 years); SR = Semantic Relations ( $\geq 9.00$  years); WC-R = Word Classes-Receptive; WC-E = Word Classes-Expressive; WC-T = Word Classes-Total; EV = Expressive Vocabulary; WD = Word Definitions (cut-off:  $< 7$ : mild-moderate problems;  $< 4$ : severe problems).

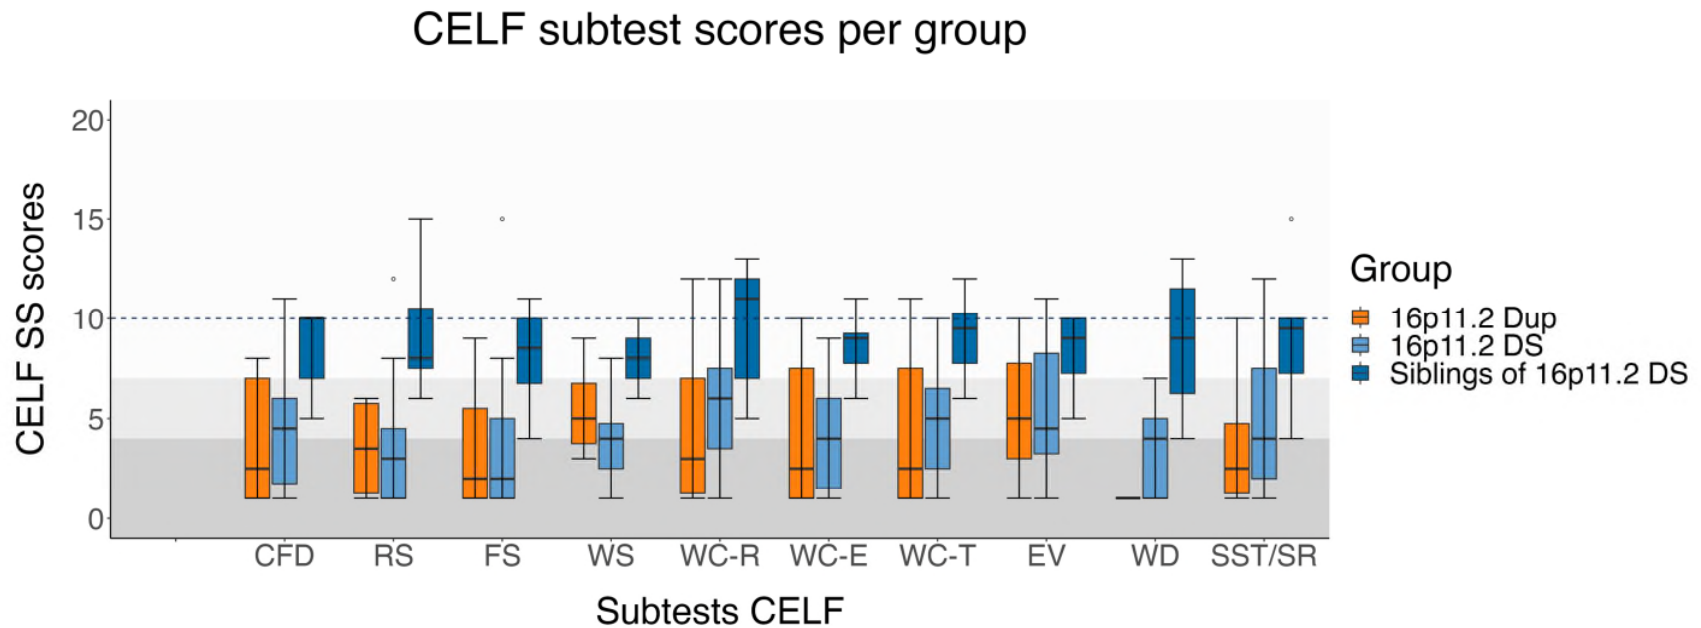

Supplement: Supplementary file 5 [file 1]
