# Supplementary material
Source: publisher figshare collection journal article supplement (https://asha.figshare.com/articles/dataset/_/27228702)
Supplement: Supplementary file 6 [file 1]

**Supplemental Material S1.** CNV groups and siblings of 16p11.2DS compared to the general population.

|               | <b>16p11.2DS</b><br><i>n</i><br><i>M (SD)</i><br>Median | <b>Statistical<br/>outcomes<br/>group level</b><br>One sample <i>t</i> -test<br>( <i>t/V</i> = , <i>p</i> = , <i>d/r</i> = ) | <b>16p11.2Dup</b><br><i>n</i><br><i>M (SD)</i><br>Median | <b>Statistical<br/>outcomes<br/>group level</b><br>One sample <i>t</i> -test<br>( <i>t/V</i> = , <i>p</i> = , <i>d/r</i> = ) | <b>Siblings of<br/>16p11.2DS</b><br><i>n</i><br><i>M (SD)</i><br>Median | <b>Statistical<br/>outcomes<br/>group level</b><br>One sample <i>t</i> -test<br>( <i>t/V</i> = , <i>p</i> = , <i>d/r</i> = ) |
|---------------|---------------------------------------------------------|------------------------------------------------------------------------------------------------------------------------------|----------------------------------------------------------|------------------------------------------------------------------------------------------------------------------------------|-------------------------------------------------------------------------|------------------------------------------------------------------------------------------------------------------------------|
| CELF CLS:     |                                                         |                                                                                                                              |                                                          |                                                                                                                              |                                                                         |                                                                                                                              |
| <i>n</i>      | 23                                                      | <i>V</i> = 1.000                                                                                                             | 10                                                       | <i>V</i> = 0.000                                                                                                             | 8                                                                       | <i>t</i> = -1.549                                                                                                            |
| <i>M (SD)</i> | 65.04 (13.40)                                           | <b><i>p</i> &lt; .001*</b>                                                                                                   | 64.00 (13.31)                                            | <b><i>p</i> = .005*</b>                                                                                                      | 92.63 (13.47)                                                           | <i>p</i> = .165                                                                                                              |
| Median        | 61.00                                                   | <i>r</i> = -.993                                                                                                             | 55.50                                                    | <i>r</i> = -1.000                                                                                                            | 92.50                                                                   | <i>d</i> = -0.643                                                                                                            |
| CELF RLI:     |                                                         |                                                                                                                              |                                                          |                                                                                                                              |                                                                         |                                                                                                                              |
| <i>n</i>      | 23                                                      | <i>t</i> = -9.562                                                                                                            | 10                                                       | <i>t</i> = -6.845                                                                                                            | 8                                                                       | <i>t</i> = -1.646                                                                                                            |
| <i>M (SD)</i> | 71.91 (14.09)                                           | <b><i>p</i> &lt; .001*</b>                                                                                                   | 67.00 (15.25)                                            | <b><i>p</i> &lt; .001*</b>                                                                                                   | 92.88 (12.24)                                                           | <i>p</i> = .144                                                                                                              |
| Median        | 66.00                                                   | <i>d</i> = -1.994                                                                                                            | 60.00                                                    | <i>d</i> = -2.660                                                                                                            | 95.00                                                                   | <i>d</i> = -0.500                                                                                                            |
| CELF ELI:     |                                                         |                                                                                                                              |                                                          |                                                                                                                              |                                                                         |                                                                                                                              |
| <i>n</i>      | 23                                                      | <i>V</i> = 1.000                                                                                                             | 10                                                       | <i>V</i> = 0.000                                                                                                             | 8                                                                       | <i>t</i> = -1.891                                                                                                            |
| <i>M (SD)</i> | 63.61 (13.40)                                           | <b><i>p</i> &lt; .001*</b>                                                                                                   | 65.10 (14.48)                                            | <b><i>p</i> = .005*</b>                                                                                                      | 90.75 (13.83)                                                           | <i>p</i> = .100                                                                                                              |
| Median        | 58.00                                                   | <i>r</i> = -.993                                                                                                             | 55.50                                                    | <i>r</i> = -1.000                                                                                                            | 91.00                                                                   | <i>d</i> = -0.667                                                                                                            |
| PPVT WCS:     |                                                         |                                                                                                                              |                                                          |                                                                                                                              |                                                                         |                                                                                                                              |
| <i>n</i>      | 21                                                      | <i>t</i> = -6.518                                                                                                            | 10                                                       | <i>t</i> = -3.276                                                                                                            | 8                                                                       | <i>t</i> = -0.861                                                                                                            |
| <i>M (SD)</i> | 80.29 (13.86)                                           | <b><i>p</i> &lt; .001*</b>                                                                                                   | 77.40 (21.81)                                            | <b><i>p</i> = .010*</b>                                                                                                      | 94.38 (18.47)                                                           | <i>p</i> = .418                                                                                                              |
| Median        | 81.00                                                   | <i>d</i> = -1.422                                                                                                            | 71.50                                                    | <i>d</i> = -1.036                                                                                                            | 95.00                                                                   | <i>d</i> = -0.305                                                                                                            |
| FSIQ:         |                                                         |                                                                                                                              |                                                          |                                                                                                                              |                                                                         |                                                                                                                              |
| <i>n</i>      | 21                                                      | <i>t</i> = -10.466                                                                                                           | 10                                                       | <i>t</i> = -4.461                                                                                                            | 8                                                                       | <i>t</i> = -2.041                                                                                                            |
| <i>M (SD)</i> | 71.33 (12.55)                                           | <b><i>p</i> &lt; .001*</b>                                                                                                   | 70.10 (21.20)                                            | <b><i>p</i> = .002*</b>                                                                                                      | 90.13 (13.69)                                                           | <i>p</i> = .081                                                                                                              |
| Median        | 74.00                                                   | <i>d</i> = -2.284                                                                                                            | 63.00                                                    | <i>d</i> = -1.411                                                                                                            | 89.00                                                                   | <i>d</i> = -0.694                                                                                                            |
| NVI:          |                                                         |                                                                                                                              |                                                          |                                                                                                                              |                                                                         |                                                                                                                              |
| <i>n</i>      | 22                                                      | <i>t</i> = -8.837                                                                                                            | 10                                                       | <i>t</i> = -5.834                                                                                                            | 8                                                                       | <i>t</i> = -1.414                                                                                                            |
| <i>M (SD)</i> | 73.00 (14.35)                                           | <b><i>p</i> &lt; .001*</b>                                                                                                   | 69.70 (16.43)                                            | <b><i>p</i> &lt; .001*</b>                                                                                                   | 92.25 (15.50)                                                           | <i>p</i> = .200                                                                                                              |
| Median        | 75.00                                                   | <i>d</i> = -1.884                                                                                                            | 65.00                                                    | <i>d</i> = -1.845                                                                                                            | 90.00                                                                   | <i>d</i> = -0.556                                                                                                            |

SRS-2:

|                        |               |                            |               |                            |              |                   |
|------------------------|---------------|----------------------------|---------------|----------------------------|--------------|-------------------|
| <i>n</i>               | 21            | <i>t</i> = 7.710           | 10            | <i>t</i> = 5.746           | 8            | <i>t</i> = -0.379 |
| <i>M</i> ( <i>SD</i> ) | 79.14 (17.32) | <b><i>p</i> &lt; .001*</b> | 83.40 (18.38) | <b><i>p</i> &lt; .001*</b> | 49.13 (6.53) | <i>p</i> = .716   |
| Median                 | 77.00         | <i>d</i> = 1.682           | 81.00         | <i>d</i> = 1.817           | 49.00        | <i>d</i> = -0.134 |

*Note.* CLS = Core Language Score; RLI = Receptive Language Index; ELI = Expressive Language Index; WCS = Word Comprehension Score; FSIQ = Full-Scale IQ; NVI = Nonverbal Index (norm group average = 100, cut-off: < 85: mild-moderate, < 70: severe); SRS-2 = Social Responsiveness Scale (norm group average = 50, cut-off: > 60: mild-moderate, > 75: severe).

Statistical outcomes: *p*-value; \*significant with FDR, *t*-value or *V*-value. Cohen's *d* or rank biserial correlation *r* as effect size.
