# Supplementary material
Source: publisher figshare collection journal article supplement (https://asha.figshare.com/articles/dataset/_/27228702)
Supplement: Supplementary file 7 [file 1]

**Supplemental Material S6.** Regression analyses predicting language scores while controlling for SRS and NVI scores in 16p11.2 CNVs.

|                                             |                          | Unstandardized <i>SE</i> |       | <i>t</i> | <i>p</i>      | <i>R</i> <sup>2</sup> |
|---------------------------------------------|--------------------------|--------------------------|-------|----------|---------------|-----------------------|
|                                             |                          | coefficients             |       |          |               |                       |
| <b>16p11.2DS</b><br><b>(<i>n</i> = 23)</b>  | H <sub>1</sub> Intercept | -1.845                   | 0.544 | -3.390   | <b>.003**</b> |                       |
|                                             | SRS-2 total z-score      | -0.032                   | 0.120 | -0.266   | .793          | 0.099                 |
|                                             | CELF CLS z-score         | NVI z-score              | 0.314 | 0.224    | 1.401         | .178                  |
| <b>16p11.2Dup</b><br><b>(<i>n</i> = 10)</b> | H <sub>1</sub> Intercept | -0.721                   | 0.208 | -3.461   | <b>.011**</b> |                       |
|                                             | SRS-2 total z-score      | 0.066                    | 0.066 | 0.990    | .355          | 0.923                 |
|                                             | CELF CLS z-score         | NVI z-score              | 0.703 | 0.111    | 6.323         | <b>&lt; .001**</b>    |

*Note.* CLS = Core Language Score; SRS = Social Responsiveness Scale; NVI = Nonverbal Index (standardized norm group average = 0, *SD* = 1, cut-off: < -1: mild-moderate, < -2: severe). Statistical outcomes: *p*-value; \*significant at *p* < .05, \*\*significant with FDR. *R*<sup>2</sup> coefficient of determination. Odds ratio as effect size.
